# Supplementary material
Source: PubMed Central journal article supplement (PMC3123858)

E-cadherin

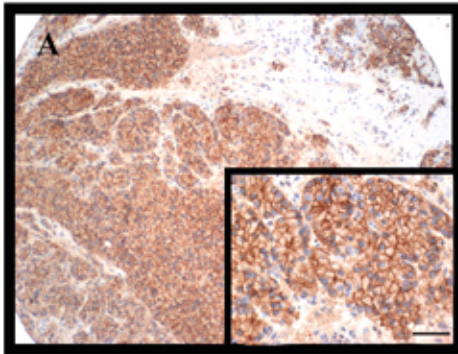

ZEB1

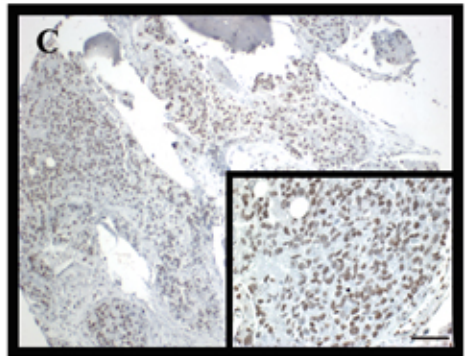

neg. control

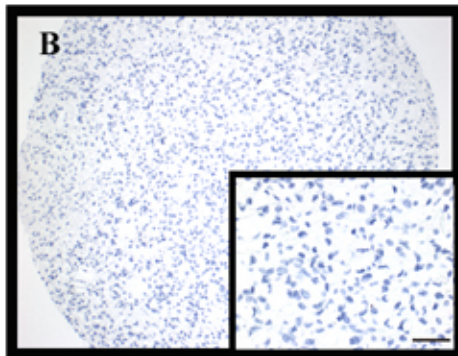

neg. control

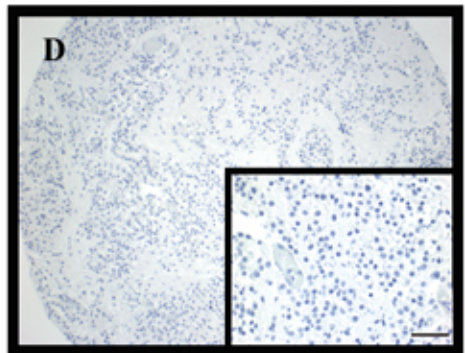

Supplement: mmc1.pdf [file mmc1.pdf]

A

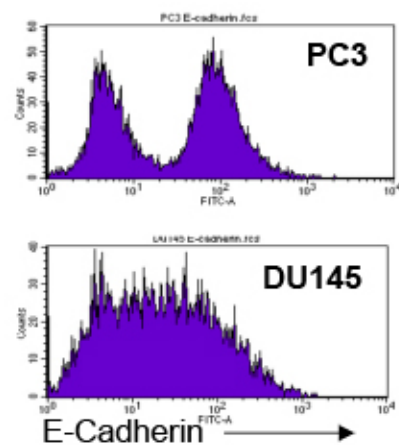

B

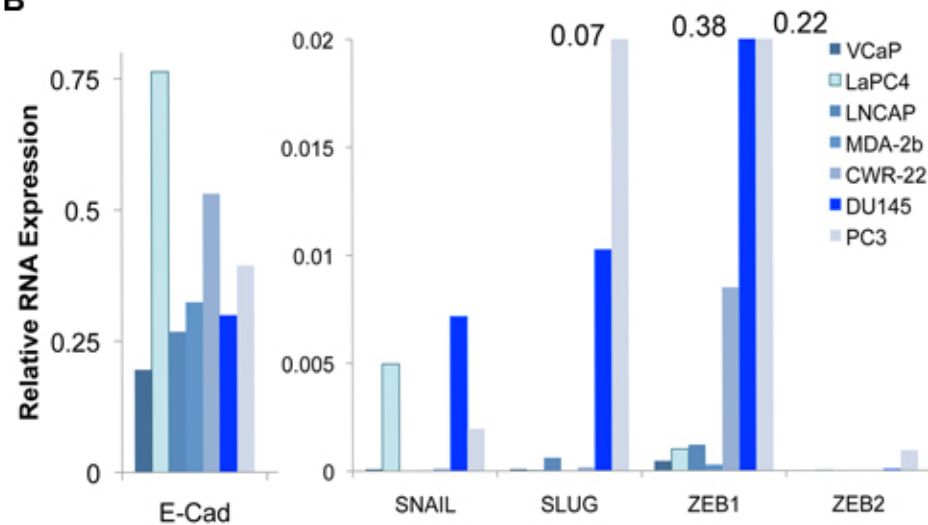

C

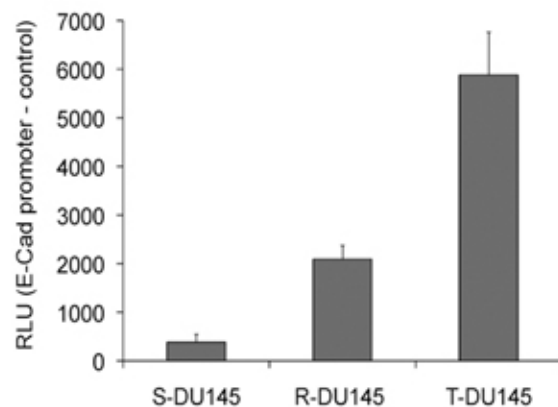

D

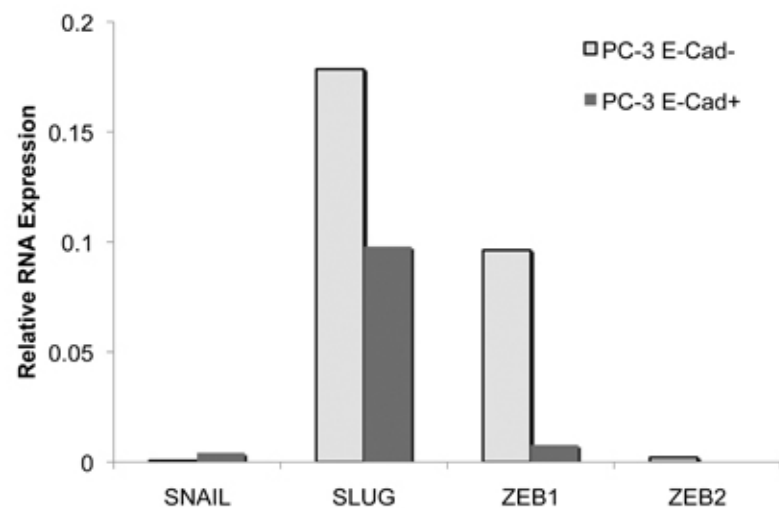

Supplement: mmc2.pdf [file mmc2.pdf]

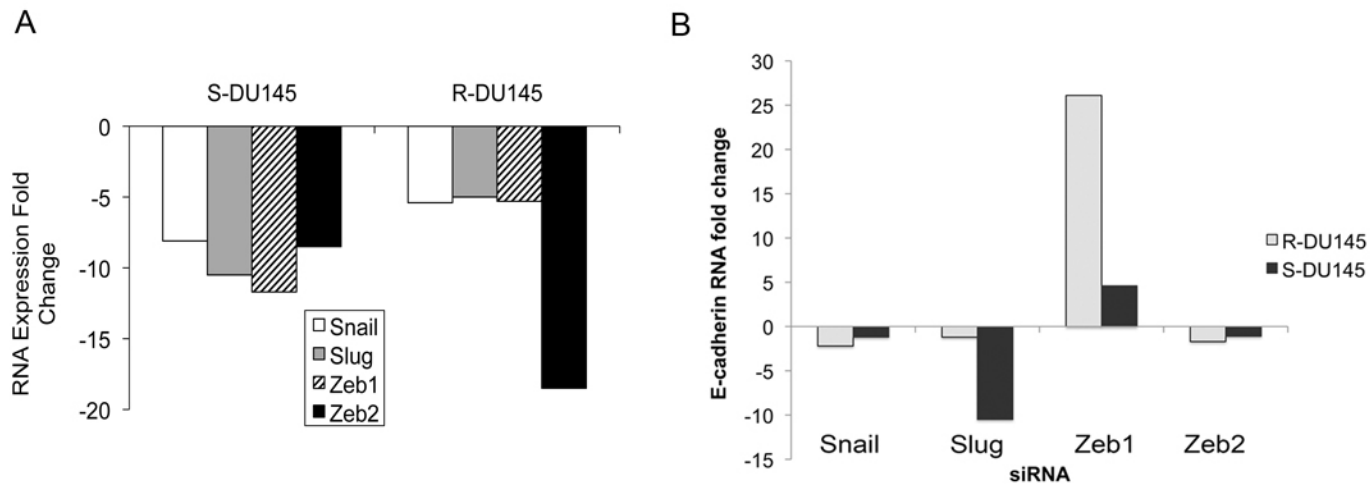

Supplement: mmc3.pdf [file mmc3.pdf]

Xenograft T-DU145 Subline

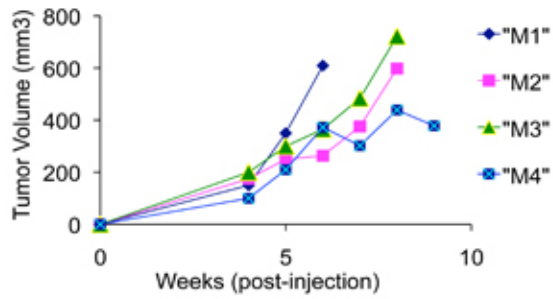

Xenograft R-DU145 Subline

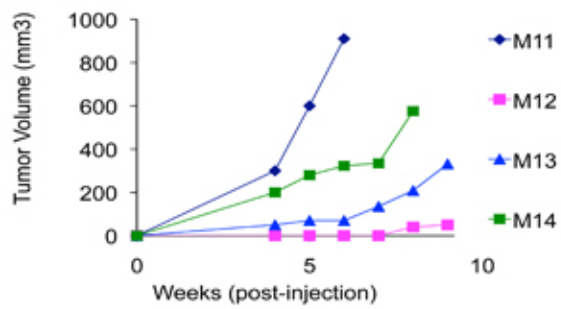

Supplement: mmc4.pdf [file mmc4.pdf]
